# Supplementary material for: Bromoperoxidase mimic as catalysts for oxidative bromination—synthesis, structures and properties of the diversified oxidation state of vanadium(iii, iv and v) complexes with pincer N-heterocycle ligands
Source: Royal Society of Chemistry journal article supplement (doi:10.1039/c3ce40410b), 2013-01-01
Supplement: c3ce40410b.pdf [file c3ce40410b.pdf]

**Bromoperoxidase mimics as catalysts for oxidative  
bromination — Synthesis, Structures and Properties of the  
diversified oxidation state of vanadium (III, IV and V)  
complexes with pincer-N-heterocycle ligands**

Chen Chen<sup>2</sup>, Qiao Sun<sup>3</sup>, Dongxue Ren<sup>2</sup>, Rui Zhang<sup>2</sup>, Feng Ying Bai<sup>1\*</sup>, Yongheng  
Xing<sup>2\*</sup>, Zhan Shi<sup>4</sup>

<sup>1</sup> College of Chemistry and Chemical engineering, Liaoning Normal University, Huanghe  
Road 850<sup>#</sup>, Dalian City, 116029, P.R. China.

<sup>2</sup> ARC Centre of Excellence for Functional Nanomaterials, Australian Institute for  
Bioengineering and Nanotechnology, The University of Queensland, Brisbane 4072

<sup>3</sup> College of Life Science, Liaoning Normal University, Dalian 11602, P.R. China

<sup>4</sup> State Key Laboratory of Inorganic Synthesis and Preparative Chemistry, College of Chemistry,  
Jilin University, Changchun 130012, P.R. China

\*e-mail: [xingyongheng2000@163.com](mailto:xingyongheng2000@163.com) tel: 0411-82156987

Table S1. The deviations of the coordinated atoms out of equatorial plane for **1-5**.

Table S2. Eigenvalues (in Hartree) of HOMO and LUMO orbitals (a.u) and the gaps (eV) between them of the complexes **1-5**.

Table S3. The atomic net charge for the complexes calculated at the PBE level.

Fig. S1 The measurable absorbance dependence of time for the complexes **2-5**. Conditions used:

pH = 5.8, c(KBr) = 0.4 mol/L, c(H<sub>2</sub>O<sub>2</sub>) = 1 mmol/L, c(phenol red) = 10<sup>-4</sup> mol/L.  
 c(complex **2**/mmol/L) = a: 1.53×10<sup>-2</sup>; b: 3.01×10<sup>-2</sup>; c: 4.58×10<sup>-2</sup>; d: 6.11×10<sup>-2</sup>; e: 7.64×10<sup>-2</sup>.  
 c(complex **3**/mmol/L) = a: 7.39×10<sup>-3</sup>; b: 1.48×10<sup>-2</sup>; c: 2.22×10<sup>-2</sup>; d: 2.96×10<sup>-2</sup>;  
 e: 3.69×10<sup>-2</sup>. c(complex **4**/mmol/L) = a: 1.96×10<sup>-2</sup>; b: 3.92×10<sup>-2</sup>; c: 5.89×10<sup>-2</sup>; d: 9.81×10<sup>-2</sup>;  
 e: 1.18×10<sup>-1</sup>; e: 1.06×10<sup>-1</sup>. c(complex **5**/mmol/L) = a: 1.87×10<sup>-2</sup>; b: 3.75×10<sup>-2</sup>;  
 c: 5.62×10<sup>-2</sup>; d: 7.49×10<sup>-2</sup>; e: 9.37×10<sup>-1</sup>.

Fig. S2  $-\log(dc/dt)$  dependence of  $-\log c$  for **1** in DMF–H<sub>2</sub>O at 30 ± 0.5 °C (c is the concentration of the oxidovanadium complex **1**; Conditions used: c(phosphate buffer) = 50 mmol/L, pH = 5.8, c(KBr) = 0.4 mol/L, c(phenol red) = 10<sup>-4</sup> mol/L.

Table S1. The deviations of the coordinated atoms out of equatorial plane for **1-5**

| <b>1</b> |             | <b>2</b> |             | <b>3</b> |             | <b>4</b> |             | <b>5</b> |             |
|----------|-------------|----------|-------------|----------|-------------|----------|-------------|----------|-------------|
| V        | -0.0088(14) | V        | 0.4435(22)  | V1       | -0.0878(14) | V        | -0.2738(16) | V        | -0.3733(14) |
| O2       | 0.0000      | O        | 2.0320(37)  | O1       | 0.5165(18)  | O1       | -1.8658(29) | O1       | -1.9640(27) |
| O3       | 0.0000      | N3       | -0.2321(21) | O2       | 1.9732(27)  | O2       | 1.9485(29)  | O2       | 1.8224(27)  |
| N5       | 1.9807(27)  | N7       | -1.7060(42) | O3       | -0.2415(17) | O3       | 0.0105(11)  | O3       | 0.1048(10)  |
| N1       | 0.0000      | N2       | -0.2226(20) | O4       | -2.0678(27) | N1       | 0.0164(18)  | N1       | 0.1662(16)  |
| N6       | -1.9961(28) | N5       | 0.2260(20)  | N1       | 0.4646(20)  | N4       | -0.0130(14) | N4       | -0.1343(13) |
|          |             | N6       | 0.2287(21)  | N5       | -0.6358(19) | N2       | -0.0139(15) | N2       | -0.1367(13) |
|          |             |          |             | N7       | -0.1038(17) |          |             |          |             |

Table S2. Eigenvalues (in Hartree) of HOMO and LUMO orbitals (a.u) and the gaps (eV) between them of the complexes **1-5**.

| Complex | <b>1</b> | <b>2</b> | <b>3</b> | <b>4</b> | <b>5</b> |
|---------|----------|----------|----------|----------|----------|
| HOMO    | -0.2625  | -0.1819  | -0.1850  | -0.1829  | -0.1773  |
| LUMO    | -0.1495  | -0.1818  | -0.1834  | -0.1827  | -0.1769  |
| Gap     | 3.074    | 0.002    | 0.037    | 0.005    | 0.009    |

Table S3. The atomic net charge for the complexes calculated at the PBE level.

| 1  |        | 2  |        | 3  |        | 4  |        | 5  |        |
|----|--------|----|--------|----|--------|----|--------|----|--------|
| V1 | 0.724  | V  | 0.422  | V1 | 0.554  | V  | 1.113  | V  | 1.101  |
| O2 | -0.481 | O  | -0.539 | O1 | -0.481 | O1 | -0.571 | O1 | -0.604 |
| O3 | -0.471 | N3 | -0.201 | O2 | -0.489 | O2 | -0.608 | O2 | -0.566 |
| N5 | -0.197 | N7 | -0.432 | O3 | -0.467 | O3 | -0.541 | O3 | -0.571 |
| N1 | -0.513 | N2 | -0.208 | O4 | -0.471 | N1 | -0.417 | N1 | -0.284 |
| N6 | -0.199 | N5 | -0.185 | N1 | -0.450 | N4 | -0.291 | N4 | -0.282 |
|    |        | N6 | -0.181 | N5 | -0.185 | N2 | -0.312 | N2 | -0.135 |
|    |        |    |        | N7 | -0.218 |    |        |    |        |

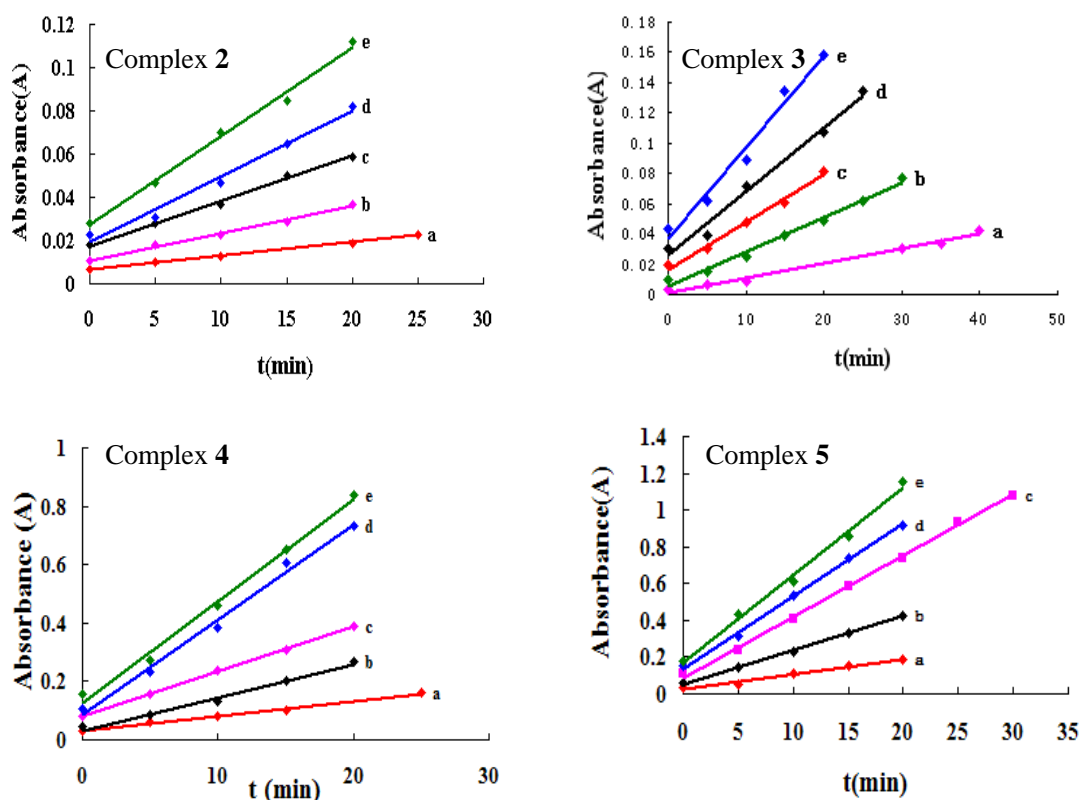

Fig. S1 The measurable absorbance dependence of time for the complexes 2-5. Conditions used: pH = 5.8, c(KBr) = 0.4 mol/L, c(H<sub>2</sub>O<sub>2</sub>) = 1 mmol/L, c(phenol red) = 10<sup>-4</sup> mol/L. c(complex 2/mmol/L) = a: 1.53×10<sup>-2</sup>; b: 3.01×10<sup>-2</sup>; c: 4.58×10<sup>-2</sup>; d: 6.11×10<sup>-2</sup>; e: 7.64×10<sup>-2</sup>. c(complex 3/mmol/L) = a: 7.39×10<sup>-3</sup>; b: 1.48×10<sup>-2</sup>; c: 2.22×10<sup>-2</sup>; d: 2.96×10<sup>-2</sup>; e: 3.69×10<sup>-2</sup>. c(complex 4/mmol/L) = a: 1.96×10<sup>-2</sup>; b: 3.92×10<sup>-2</sup>; c: 5.89×10<sup>-2</sup>; d: 9.81×10<sup>-2</sup>; e: 1.18×10<sup>-1</sup>; e: 1.06×10<sup>-1</sup>. c(complex 5/mmol/L) = a: 1.87×10<sup>-2</sup>; b: 3.75×10<sup>-2</sup>; c: 5.62×10<sup>-2</sup>; d: 7.49×10<sup>-2</sup>; e: 9.37×10<sup>-1</sup>.

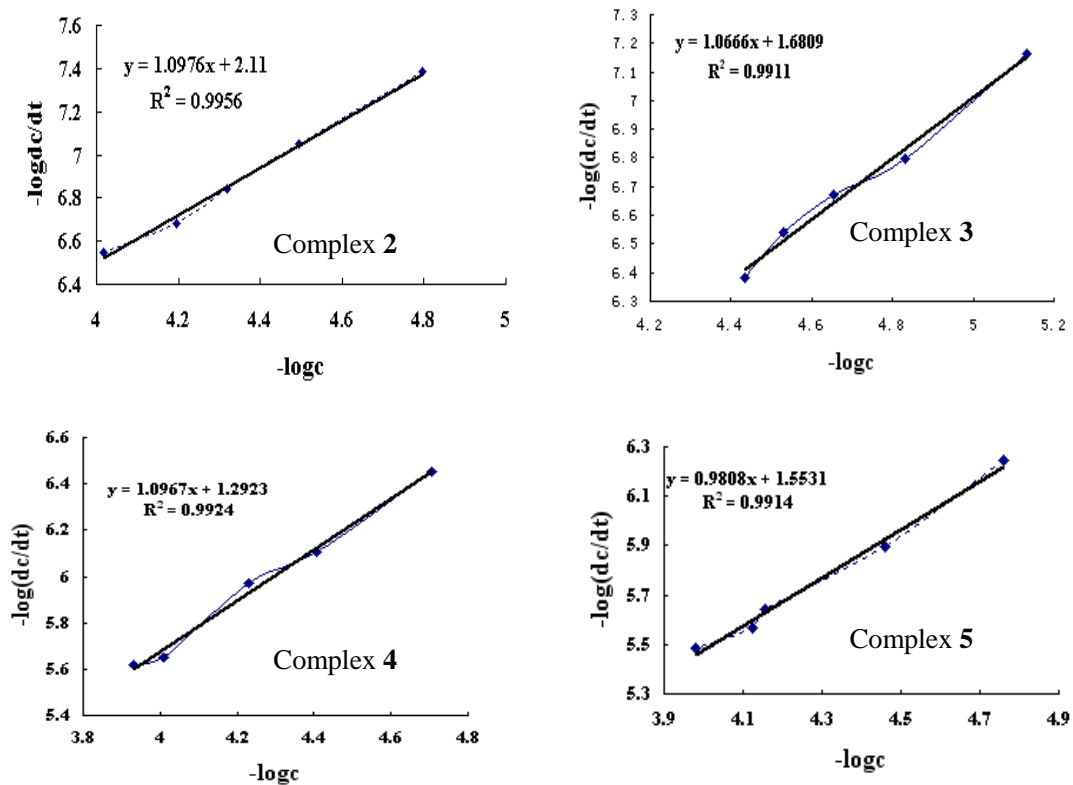

Fig. S2  $-\log(d\epsilon/dt)$  dependence of  $-\log c$  for 2-5 in DMF-H<sub>2</sub>O at  $30 \pm 0.5$  °C ( $c$  is the concentration of the oxidovanadium complex 2-5; Conditions used:  $c(\text{phosphate buffer}) = 50$  mmol/L,  $\text{pH} = 5.8$ ,  $c(\text{KBr}) = 0.4$  mol/L,  $c(\text{phenol red}) = 10^{-4}$  mol/L).
